# Supplementary material
Source: PubMed Central journal article supplement (PMC4821475)
Supplement: NIHMS690114-supplement-1.pdf [file NIHMS690114-supplement-1.pdf]

## Supplementary Note 1

### **TALE-based two-hybrid approaches appear ineffective at targeting RNAs to individual DNA loci.**

In our initial strategy the chromatin-targeting protein “conduits” were based upon transcription activator-like effectors (TALEs, **Supplementary Fig. 2a**), a versatile class of customizable DNA-binding repeat proteins derived from *Xanthomonas sp.*<sup>1,2</sup>. Synthetic TALE domains are attractive because of the relative ease and modularity of their design: a TALE that specifically targets a given DNA sequence can be designed by altering the repeat-variable diresidues (RVDs) harbored within each of its repeats, according to a simple code<sup>3,4</sup>. As such, TALEs have been exploited to precisely modulate the genome, transcriptome and epigenome in a wide variety of biological systems. In our design, the TALE was fused to a non-aggregating mutant of the MS2 phage-coat protein, a high-affinity, highly specific RNA-binding domain that has been extensively characterized<sup>5</sup>. Likewise, the ncRNA of interest was fused a cassette of cognate stem-loops recognized by the MS2 protein (MS2-SL). Hence, the TALE~MS2 chimera should serve as a “molecular bridge” that targets the ncRNA~MS2-SL chimera to a DNA locus, in a scheme reminiscent of a classic two-hybrid system (**Supplementary Fig. 2a**).

We confirmed that a TALE domain could regulate our dual reporter system (**Supplementary Fig. 2b,c**), through direct activation. In mixed populations of integrated reporter cells, expression of an optimized GLuc-targeting TALE domain fused to the VP64 transcription activator (TALE~VP, **Supplementary Fig. 2a**) dramatically increased levels of mCerulean and *Gluc*, activating them 4.1-fold relative to control cells expressing an unmodified TALE (**Supplementary Fig. 2b**). Some isolated clonal cell lines exhibited even higher direct activation: in one line, mCerulean and *GLuc* expression increased ten-fold in response to

TALE~VP (*data not shown*). Next, we tested if noncovalent TALE•RNA complexes could also modulate reporter function. However, since it is unclear *a priori* which, if any, natural ncRNA can be functionally reconstituted ectopically, we first employed a synthetic ncRNA scaffold designed to serve as a positive control, in a scheme reminiscent of a classic three-hybrid system (**Supplementary Fig. 2a**), and analogous to the “bridged activation” assay we employed in the development of CRISP-Disp (**Fig. 1b**). As in that system, the RNA scaffold (analogous to the CRISP-Disp TOP1–4 “accessory domain,” **Fig. 1a**) was derived from the *T. thermophila* Group I intron P4–P6 domain, a well studied ~250 nucleotide, autonomously folding motif<sup>6</sup> (**Supplementary Fig. 4a,b**). We replaced a dispensable internal loop within P4–P6 (L6b, Ref. 6) with a GAAA tetraloop, or with a cassette of five high-affinity stem-loops for the bacteriophage PP7 coat protein<sup>7</sup>, generating “0xSL” and “5xSL” constructs, respectively. These constructs were coexpressed with the TALE~MS2 chimera and with PP7~VP. Hence, TALE recruitment of the 5xSL complex, but not of the 0xSL complex, should concomitantly recruit the PP7~VP protein to the reporter site and activate expression (**Supplementary Fig. 2a**).

Using transient reporters, we observed robust bridged activation by the 5xSL complex (~75-fold activation,  $p < 0.005$ , Student’s one-tailed t-test, relative to cells expressing an unmodified TALE;  $n=3$ ), corresponding to approximately 31% of direct activation exhibited by the TALE~VP fusion under equivalent conditions (**Supplementary Fig. 2c**). As expected, no bridged activation was observed with the 0xSL complex. In stably integrated reporter cells, however, we did not observe bridged activation using the three-hybrid system: cells expressing the 5xSL complex exhibited *Gluc* levels indistinguishable from those expressing the 0xSL complex or the TALE domain alone (**Supplementary Fig. 2c**,  $P > 0.1$ , Student’s one-tailed t-test relative to cells expressing an unmodified TALE;  $n=9$ ). This is in stark contrast with the results

of the analogous CRISP-Disp experiments. There, bridged activation by U6-driven TOP1 and INT, scaled relative to the direct activation exhibited by each construct, was comparable using transient or integrated reporters (**Fig. 1c**). We confirmed by qRT-PCR that all components of the TALE 5xSL complex were expressed at comparable levels (*data not shown*). Furthermore, RNA Immunoprecipitation (RIP) against the TALE~MS2 and PP7~VP proteins demonstrated that the predicted TALE~MS2•RNA and 5xSL•PP7~VP binary complexes were formed (**Supplementary Fig. 2d**). Co-IP/western blotting likewise indicated measurable formation of the expected TALE~MS2•5xSL•PP7~VP ternary complex (**Supplementary Fig. 2d**). Hence, the lack of reporter induction cannot be explained by the absence of a critical component or complex.

While the sizable RNA yields in the TALE RIP experiments (approximately 2.0% of inputs, **Supplementary Fig. 2d**) imply that a substantial fraction of the Scaffold RNA is bound by the protein chimera, the converse quantity—the fraction of TALE protein bound by RNA—is opaque to this method. Since translation of the TALE mRNA likely amplifies TALE protein abundance by several orders of magnitude, relative to that of the Scaffold RNA<sup>8</sup>, we anticipate that this fraction may be very low. Moreover, because binding of TALE~MS2 chimera to its DNA and RNA targets are essentially independent events, we hypothesized that the lack of bridged activation in integrated reporter cells resulted from the pool of free TALE protein outcompeting the comparably smaller pool of TALE•RNA complexes for the target DNA locus (**Supplementary Fig. 2e**). Hence, the limiting concentrations of target DNA and excess of conduit protein preclude the formation of DNA•Protein•RNA ternary complexes<sup>9</sup>. Our observations with transient reporters are consistent with this hypothesis, since these conditions essentially increase the concentration of available DNA target sites, facilitating population of the

ternary complex and, consequently, bridged activation. However, given the difficulty of simultaneously measuring the absolute abundances of unrelated RNA and protein species<sup>8</sup>—as well as their effective  $K_{DS}$ —*in vivo*, we have not exhaustively tested this model.

In theory, several strategies might be employed to rescue the fundamental stoichiometric imbalance that we suspected of hampering the TALE two-hybrid system. First, we could elevate the ncRNA concentration to approximate that of the TALE component. However, this approach is technically challenging, may require re-optimization for each new ncRNA construct tested, and would move the ncRNA into an expression regime far above physiological levels populated by its natural counterparts<sup>10, 11</sup>. An alternate approach would be to diminish the TALE concentration to approximate that of the ncRNA component. This too is technically challenging: in pilot experiments, titrating the TALE concentration downward—either by decreasing the transfected plasmid mass, or by decreasing the TALE promoter strength—caused a loss of direct activation without facilitating bridged activation (*data not shown*). We suspect that, while lowering the TALE fusion concentration would cause a larger proportion of TALEs to be bound by its cognate ncRNA (for which the  $K_D$  is in the low-nM to high-pM range<sup>5</sup>), it would also weaken the binding of the TALE to its DNA target. Hence, the efficacy of this approach would be ultimately constrained by the TALE•DNA  $K_D$ , a parameter for which optimization is expected to be cumbersome and target-dependent<sup>12</sup>.

A final approach toward circumventing the TALE-ncRNA stoichiometric imbalance entails reengineering the system so as to directly couple the TALE's DNA-binding and RNA-binding activities. Were these two activities intrinsically linked—as is naturally accomplished with the CRISPR system (**Supplementary Fig. 1b**)—then a naked TALE~MS2 protomer would be incapable of competing with TALE~MS2•ncRNA complexes for the DNA target locus

(**Supplementary Fig. 2e**). Towards this end, we devised a “split TALE” approach, analogous to split-fluorescent protein methods<sup>13</sup>, in which a full-length TALE was divided into two smaller domains that are assembled by approximation on a “Splint RNA” scaffold (**Supplementary Fig. 3a**). In our design, the optimized 12 nt-binding TALE domain<sup>2</sup> was split at the boundary between the sixth and seventh repeats (between GLY34 and LEU1), generating six nt-binding N-TALE and 6.5 nt-binding<sup>2</sup> C-TALE constructs (**Supplementary Fig. 3a**). The N-TALE construct was appended at its C-terminus with an MS2 domain; C-TALE was likewise appended at its N-terminus with PP7. To facilitate RNA-templated assembly, these domains were coexpressed with Splint RNAs bearing cassettes of MS2 and PP7 stem-loops (**Supplementary Fig. 3b**).

To test the viability of our approach, we devised a variation in our Bridged Activation assay, in which C-TALE was appended with a C-terminal VP64 transcription activator (**Supplementary Fig. 3a**). Templated assembly of the N-TALE•RNA•C-TALE ternary complex should therefore recruit VP64 to the reporter locus, mimicking activation by the full TALE~VP construct (**Supplementary Fig. 2a–c**). We surveyed four Splint RNAs—designed in reference to established constructs<sup>13–15</sup>—for the ability to nucleate split TALE assembly (**Supplementary Fig. 3b**). Unfortunately, our design proved unviable in several regards. With transient reporters, coexpression of the split TALE domains alone, in absence of a Splint RNA, was sufficient to induce measurable reporter activity to ~20% of the level observed with the intact TALE~VP construct (**Supplementary Fig. 3c**). This activation was diminished upon Splint RNA coexpression, implying both that high copy-number target DNA was sufficient to template the formation of N-TALE•C-TALE dimers, and that Splint RNA—contrary to its design—diminished this activity. Furthermore, with integrated reporters, we did not observe bridged activation in any context (**Supplementary Fig. 3c**). As observed the full TALE two-hybrid system

(**Supplementary Fig. 2c**), we could not explain these results through an absence of any individual component or subcomplex (*data not shown*). We concede that a more systematic exploration of the experimental variables (*e.g.*, testing additional Splint RNA designs, additional TALE~phage coat linkers, different TALE domain cut sites or mutagenizing residues that might stabilize untemplated interdomain complexation) might render the split TALE approach more viable. However, such these experiments appear cumbersome and, given the comparable success of our CRISPR-based system, unnecessary.

Taken together, these data imply that under common experimental conditions, TALE-based two-hybrid approaches—and potentially, mammalian two-hybrid approaches in general—appear to be markedly less robust than CRISP-Disp. This, combined with the simplicity, flexibility and multiplexability of CRISPR-based technologies makes CRISP-Disp the superior method for ectopic ncRNA localization at individual target loci.

## **Supplementary Note 2**

### **Overview of CRISPR-Display Pol II expression systems**

In the initial implementation of CRISPR-Display (**Fig. 1a**), RNA constructs were driven from a human U6 promoter, the standard used in many CRISPR-based applications in mammalian cells (**Supplementary Fig. 1c**). Although extremely powerful, like other RNA Polymerase III (Pol III) promoters, U6 is limited in the length and sequence of its products: Pol III cannot produce transcripts longer than few hundred nucleotides, and is often terminated by stretches of consecutive uridines. Since this would preclude the use of CRISP-Disp with natural long noncoding RNAs (lncRNAs) or synthetic lncRNA-like devices, we sought a method to express functional sgRNAs driven by RNA Pol II.

The majority of Pol II transcripts are spliced and polyadenylated. This enhances export into the cytoplasm, which we reasoned would render them unsuitable for CRISP-Disp. Recently, methods have been described that generate unspliced, non-adenylated sgRNAs from Pol II-products<sup>16, 17</sup>. These methods excise mature sgRNAs from longer primary transcripts, using self-cleaving ribozymes<sup>16</sup>, by co-expressing them with a sequence-specific ribonuclease, or by exploiting endogenous nucleolytic RNA processing pathways<sup>17</sup>. However, we feared that the RNAs generated via these methods would resemble spontaneous hydrolysis products, which might diminish the stability or complex formation of the sgRNAs' accessory domains. Therefore, we instead sought a biogenesis scheme that generates nuclear-retained sgRNAs *de novo*.

Towards this end, we tested the efficacy of our five extended sgRNA topology constructs (**Fig. 1a**), expressed from six different Pol II backbones (**Supplementary Fig. 6a**). Two (“EF1 $\alpha$ /SV40pA”, and “CMV/SV40pA”) were canonical expression systems, pairing the EF1 $\alpha$  promoter (which contains an internal ~1 kb intron) or the Cytomegalovirus (CMV) immediate-early promoter-enhancer, with an SV40 polyadenylation site. Transcripts arising from each system should be capped and polyadenylated, though only those driven by the EF1 $\alpha$ -SV40pA backbone should be spliced.

Three additional systems (“CMV/3'Box,” “CMV/PAN” and “CMV/MASC”) paired the CMV promoter-enhancer with nonstandard Pol II terminators (**Supplementary Fig. 6a**). The “CMV/3'Box” system employed the U1 3'-Box, an ~80 nt element, derived from the U1 small nuclear RNA (snRNA) gene, that directs specialized Pol II transcription termination without polyadenylation<sup>18</sup>. The 3'Box is a modular motif that can functionally replace the terminators of other snRNA genes<sup>18</sup> and of noncanonical Pol II transcripts<sup>19</sup>. Although synthesis of a *bona fide* snRNA 3' terminus is greatly enhanced by coupling the 3'-Box with an snRNA promoter<sup>20, 21</sup>, it

has been shown that transcripts synthesized from strong viral promoters and terminated by the 3'-Box are preferentially enriched in the nucleus<sup>22</sup>. This effect is enhanced with longer transcripts<sup>22</sup>.

The “CMV/PAN” and “CMV/MASC” systems employed so-called expression and nuclear retention elements (ENEs). The “CMV/PAN” ENE is derived from the Kaposi’s sarcoma-associated herpesvirus (KSHV) polyadenylated nuclear (PAN) lncRNA. This ENE facilitates stabilization and nuclear retention of the lncRNA by sequestering its poly(A) tail into an extended RNA triplex structure<sup>23-25</sup>. The *MALATI* ENE used in our “CMV/MASC” system forms a similar triple-helical structure<sup>26, 27</sup>, though it is derived from an endogenous human gene and is generated through a fundamentally different biogenesis pathway. This ENE precedes a genomically encoded adenosine-rich sequence and a tRNA-like structure termed the *MALATI*-associated small cytoplasmic RNA (mascRNA)<sup>27, 28</sup>. RNase P cleaves the mascRNA from the primary transcript, liberating the poly(A)-like *MALATI* 3'-terminus<sup>28</sup>, which is sequestered within the ENE<sup>26</sup>. Our constructs included all three elements required for this process: the ENE, the A-rich tract and the mascRNA motif (**Supplementary Fig. 6a**).

Our final expression system (“U1/Sm/3'Box”) was designed to mimic the biogenesis of most small nuclear RNAs (snRNAs), which are transcribed by a noncanonical Pol II complex, exported into the cytoplasm and subsequently reimported into the nucleus<sup>29, 30</sup>. Reimport, via snurportin<sup>30</sup>, requires two elements on the snRNA: a nonstandard 5'-(2,2,7) trimethyl guanosine cap, and an “Sm” box motif, onto which the SM protein complex assembles<sup>29</sup>. To express sgRNAs modified in this manner, we drove transcription from the U1 snRNA promoter, appended the 3' terminus with the U2 Sm Box, and terminated transcription with the U1 3'Box. The U2 Sm box was chosen because, unlike its U1 counterpart, it is isolated within a modular



structural domain at the RNA's 3'-terminus, and can functionally replace the analogous motifs of other snRNAs<sup>18,29</sup>.

Direct activation activities of all constructs, driven from each expression system, are summarized in (**Supplementary Fig. 6b**). As predicted, the capped, spliced and polyadenylated transcripts arising from the EF1 $\alpha$ -SV40pA backbone were the least effective, exhibiting activities reduced to ~0.6–6.8% that of a minimal (U6-driven) sgRNA. Activities of the unspliced transcripts arising from the CMV/SV40pA were improved ~2-fold relative to their spliced EF1 $\alpha$ /SV40pA counterparts, even though overall RNA expression levels were equivalent (**Supplementary Fig. 7d**). Activities of the CMV/PAN products were essentially indistinguishable from those of CMV/SV40pA transcripts.

However, we observed notable improvements when constructs were expressed from the CMV/MASC, CMV/3'Box and U1/Sm/3'Box systems. Under CMV/MASC expression, direct activation by TOP2 was improved ~10-fold relative to its EF1 $\alpha$ /SV40pA, CMV/SV40pA and CMV/PAN counterparts. Using transient reporters, the direct activation activities of CMV/3'Box-driven TOP1, TOP2 and INT were ~25–31% that of the minimal (U6-driven) sgRNA. Overall, however, the most robust system tested was U1/Sm/3'Box, under which the activity of TOP1 exceeded that of the U6-driven minimal sgRNA, and those of TOP2, TOP3 and INT rivaled or exceeded the efficacies of their CMV/3'Box counterparts (**Supplementary Fig. 6b**).

Bridged activation assays for the best-performing constructs (TOP1, TOP2, INT), expressed from the most proficient backbones (CMV/3'Box, CMV/MASC, U1/Sm/3'Box) are summarized in (**Supplementary Fig. 6c**). From these data, two points are notable. First, as discussed in the text, expression from the CMV/3'Box system appears to restore bridged

activation to TOP2 (**Supplementary Fig. 6c–e**). Second, the comparable inefficiency of Pol II-driven INT in direct activation assays, relative to its Pol III-driven counterpart (compare **Supplementary Fig. 6b–d** and **Figure 1c–d**), is rescued in bridged activation assays when INT is expressed from the CMV/MASC and U1-Sm-3'Box backbones. This was not observed with INT species expressed from CMV/3'Box (**Supplementary Fig. 6c–d**), EF1 $\alpha$ /SV40pA, CMV/SV40pA or CMV/PAN backbones (*not shown*). We hypothesize, but have not tested, that this restoration of activity may be due to an RNA folding issue, wherein misfolded RNAs are funneled back into a viable conformation by the binding of PP7~VP64. This would correlate with the broader observation that, although dCas9 accommodates single insertions at the INT site or on the sgRNA termini, it appears less tolerant to the addition of multiple large accessory domains (as in Double TOP0, **Fig. 2a,b** and **Supplementary Fig. 8**). All of our Pol II expression systems append sequences to the 3' terminus (poly(A) tails, ENes, Sm boxes and or 3'Box elements). Of these, the 3'-terminal domains added by the CMV/MASC and U1/Sm/3'Box systems are the most structured and compact: the isolated 3'Box (as in CMV/3'Box constructs) is relatively unstructured in absence of the Sm Box, and all other systems append long poly(A) tails, which may preclude folding and dCas9 complexation.

While the U1/Sm/3'Box system may be of general use for the expression of unmodified sgRNAs and of artificial CRISP-Disp devices, we disfavor its use with natural lncRNAs. Transcripts generated from this backbone would lack a conventional 5'-cap and would be assembled into complexes with Sm proteins; this may influence their subnuclear localization and overall complex formation<sup>29</sup>. For that reason, in our own experiments, we have focused on the CMV/3'Box and CMV/MASC systems.

### Supplementary Note 3

#### “Best Practices” for CRISRP-Display construct design

Based on the results presented here, we propose a preliminary set of “best practices” for CRISP-Disp construct design. In general, the conventional U6 expression system was the most robust we employed. Surprisingly, although the U6 promoter naturally drives a product of only ~100 nt, we were able to generate transcripts several times that length at high levels (**Supplementary Fig. 12**); the overall length limitation of this system remains unclear. Under U6 control, by far the most robust insertion site for exogenous RNA domains is the “engineered loop,” (**Supplementary Fig. 1b**), which can tolerate diverse, large (>250 nt) and structurally varied inserts. This site is therefore ideal if the RNA domain of interest does not require an exposed terminus, and would not be functionally constrained by placement within a stem-loop. Although we have not tested if other internal insertion points can accommodate exogenous sequences with this degree of modularity, we anticipate that other such amenable points exist, given the structural plasticity of the sgRNA core<sup>31,32</sup>, and its ability to accommodate short stem-loops at other positions<sup>33,34</sup>. We furthermore hypothesize that certain internal inserts might perturb sgRNA folding or dCas9-binding, potentially in a guide-dependent manner, though we have not examined this exhaustively. We note, however, that problems of this sort appear more pronounced when INT-like constructs are expressed from a Pol II system (**Supplementary Fig. 6b–d**). In lieu of an INT-like design, display on the 3′ terminus, as in TOP1, is viable, although overall efficacy may be limited by the local structure near the attachment point<sup>34</sup>.

For substantially larger structures, however, or those containing stretches of poly(uridine), several expression systems are available (Refs. 16, 17, 35, and the CMV/3′-Box,

CMV/MASC and U1/Sm/U2 constructs outlined in **Supplementary Fig. 6a**). For example, the activities of constructs expressed from the U1 promoter (a “nonstandard” Pol II promoter that lacks the sequence and length limitations of U6, Ref. 19) nearly rivaled those driven by U6 (**Supplementary Fig. 6b,c**). Our U1/Sm/U2 backbone is intended to mimic the biogenesis of natural snRNAs, including their nuclear reimport<sup>29,30</sup>. While the Sm box is also expected to influence protein complexation and RNA subnuclear localization<sup>29</sup> (and therefore might diminish general CRISPR-Display efficacy), for the purpose of CRISP-Disp it appears dispensable and should be eliminated (*data not shown*). If a canonical 5'-cap is required, expression from the CMV/3'Box or CMV/MASC systems should suffice. If the ncRNA domain requires display on the sgRNA 5'-terminus to function, then only the CMV/3'Box system appears sufficient (**Supplementary Fig. 6c–e**). For these larger constructs, we generally prefer TOP1-type (and in the case of CMV/3'Box-transcripts, TOP2-type) chimeras, since INT-like construct efficacy appears to diminish somewhat with increasing insert size (**Fig. 3a,b, e** and **Supplementary Fig. 12**), and since Pol II-driven INT-like constructs appear less efficient overall. It should be noted that, for some of the TOP1-type lncRNA constructs tested here, some accessory domain loss was evident (**Fig. 2e**). However, this apparent degradation was not simply contingent upon RNA length, suggesting that RNA structure might contribute to a particular sgRNA~lncRNA's overall stability, as has been observed with smaller accessory domains<sup>34</sup>. Therefore, when implementing a CRISPR-Display lncRNA experiment, we anticipate that one may need to screen several constructs, surveying subdomains within the lncRNA, and or altering the structure at the sgRNA attachment point, so as to maximize construct efficacy and stability.

## Supplementary Tables

**Supplementary Table 1:** Sequences of the Target and Non-target cassettes in the “Reporter” and “Normalizer” constructs, respectively. Target/Non-Target motifs are boxed in gray; PAM sequences in beige; the minimal CMV Promoter in green.

| Construct                                                       | Sequence                                                                                                                                                                                                                                                                                                                                                                                                                                                                   |
|-----------------------------------------------------------------|----------------------------------------------------------------------------------------------------------------------------------------------------------------------------------------------------------------------------------------------------------------------------------------------------------------------------------------------------------------------------------------------------------------------------------------------------------------------------|
| <b>Reporter</b><br>(GLuc/<br>mCerulean/<br>Hygro <sup>R</sup> ) | 5'– ATCTAGATACGACTCACTAT AGG CAAAGCTCTA–<br>ATCTAGATACGACTCACTAT AGG AAAGGAAGCAGCCAC–<br>ATCTAGATACGACTCACTAT AGG ATAACGTTAG–<br>ATCTAGATACGACTCACTAT AGG GTGAAGTAGTCTTTGCGGTA–<br>ATCTAGATACGACTCACTAT AGG CAAAGCTCTA–<br>ATCTAGATACGACTCACTAT AGG AAAGGAAGCAGCCAC–<br>ATCTAGATACGACTCACTAT AGG ATAACGTTAG–<br>ATCTAGATACGACTCACTAT AGG GTGAAGTAGT–<br>ATCTAGATACGACTCACTAT AGG ATCCACGTATGTCGAGG–<br>TAGGCGTGTACGGTGGGAGGCCTATATAAGCAGAGCTCGTTTAGTGAACCGTCAGATCGC–3'     |
| <b>Normalizer</b><br>(CLuc/<br>Venus/<br>Puro <sup>R</sup> )    | 5'– ATCTAGATCGCCCGTCCCCT AGG CAAAGCTCTA–<br>ATCTAGATCGCCCGTCCCCT AGG AAAGGAAGCAGCCAC–<br>ATCTAGATCGCCCGTCCCCT AGG ATAACGTTAG–<br>ATCTAGATCGCCCGTCCCCT AGG GTGAAGTAGTCTTTGCGGTA–<br>ATCTAGATCGCCCGTCCCCT AGG CAAAGCTCTA–<br>ATCTAGATCGCCCGTCCCCT AGG AAAGGAAGCAGCCAC–<br>ATCTAGATCGCCCGTCCCCT AGG ATAACGTTAG–<br>ATCTAGATCGCCCGTCCCCT AGG GTGAAGTAGT–<br>ATCTAGATCGCCCGTCCCCT AGG CCGGATCCACGTATGTCGAGG–<br>TAGGCGTGTACGGTGGGAGGCCTATATAAGCAGAGCTCGTTTAGTGAACCGTCAGATCGC–3' |

**Supplementary Table 2:** gRNA sequences used in this work.

| <b>Target</b>   | <b>Sequence</b>        | <b>Reference</b> |
|-----------------|------------------------|------------------|
| GLuc            | GAUCUAGAUACGACUCACUAU  | This work        |
| <i>ASCL1</i> -1 | GCUGGGUGUCCCAUUGAAA    | Ref. 39          |
| <i>ASCL1</i> -2 | GCAGCCGCUCGCUGCAGCAG   | Ref. 39          |
| <i>ASCL1</i> -3 | GUGGAGAGUUUGCAAGGAGC   | Ref. 39          |
| <i>ASCL1</i> -4 | GUUUAUUCAGCCGGGAGUC    | Ref. 39          |
| <i>IL1RN</i> -1 | GUGUACUCUCUGAGGUGCUC   | Ref. 39          |
| <i>IL1RN</i> -2 | GACGCAGUAAGAACCAGUU    | Ref. 39          |
| <i>IL1RN</i> -3 | GCAUCAAGUCAGCCAUCAGC   | Ref. 39          |
| <i>IL1RN</i> -4 | GAGUCACCCUCCUGGAAAC    | Ref. 39          |
| <i>NTF3</i> -1  | GAGCGCGGAGCCAUCUGGCC   | Ref. 37          |
| <i>NTF3</i> -2  | GCGCGGCGCGGAAGGGGUUA   | Ref. 37          |
| <i>NTF3</i> -3  | GCGGCGCGGCGCGGGCCGGC   | Ref. 37          |
| <i>NTF3</i> -5  | GCGGUUAUAACCAGCCAACC   | Ref. 37          |
| <i>TTN</i> -1   | GCCUUGGUGAAGUCUCCUUUG  | Ref. 57          |
| <i>TTN</i> -2   | GAUGUUAAAUCCGAAAUGC    | Ref. 57          |
| <i>TTN</i> -3   | GGGCACAGUCCUCAGGUUUG   | Ref. 57          |
| <i>TTN</i> -4   | GAUGAGCUCUCUUCAACGUUA  | Ref. 57          |
| Telomere        | GUUAGGGUUAGGGUUAGGGUUA | Ref. 36          |

**Supplementary Table 3:** qPCR primers used in this work, in the order cited

| Target                    | Forward Primer                | Reverse Primer                  | Name <sup>a</sup> | Efficiency <sup>b</sup> |
|---------------------------|-------------------------------|---------------------------------|-------------------|-------------------------|
| sgRNA(GLuc)               | AGATACGACTCACTATGTTTAAGAGC    | TCAAGTTGATAACGGACTAGCCT         | p1                | 0.848                   |
| P4–P6                     | CAGCCGTTTCAGTACCAAGTCT        | GGACCATGTCCGTCAGCTT             | p2                | 0.858                   |
| <i>GAPDH</i>              | TTCGACAGTCAGCCGCATCTTCTT      | GCCCAATACGACCAAATCCGTTGA        |                   | 0.847                   |
| <i>ASCL1</i> <sup>c</sup> | GGAGCTTCTCGACTTCACCA          | AACGCCACTGACAAGAAAGC            |                   | 0.848                   |
| <i>IL1RN</i> <sup>c</sup> | GGAATCCATGGAGGGAAGAT          | TGTTCTCGCTCAGGTCAGTG            |                   | 0.827                   |
| <i>NTF3</i> <sup>d</sup>  | GATAAACACTGGAAGTCTCAGTGCAA    | GCCAGCCCACGAGTTTATTGT           |                   | 0.851                   |
| <i>TTN</i> <sup>e</sup>   | TGTTGCCACTGGTGCTAAAG          | ACAGCAGTCTTCTCCGCTTC            |                   | 0.851                   |
| Double P4–P6              | GGATGCAGTTCACACCTCCA          | CCTTTCCCGCAATTCCGAAG            | p3                | 0.840                   |
| pRNA_GSP1 <sup>f</sup>    | GTCGGTGACGCGACCT              | <i>TAAC TTGCTACGAATACGAGTCC</i> |                   | 0.892                   |
| <i>FALEC_GSP1</i>         | GCAGGTTTCACAGAGGGAAGA         | CCACTGAGGACACCGACTAC            |                   | 0.852                   |
| <i>FALEC_GSP2</i>         | AGTCGGTGTCTCAGTGGTA           | AAGAGCAGGCTACAAGTGCT            |                   | 0.859                   |
| <i>TRERNA1_GSP1</i>       | GTGGTTTTACGTGGCCGATT          | GCCTGACGTGAAGTAGCTTT            |                   | 0.873                   |
| ncRNA-a3_GSP1             | AGTACCCGACGAGCGTTATG          | AGGCTGGTACAGATGGGTCT            |                   | 0.814                   |
| ncRNA-a3_GSP2             | GGAGTTTGCAGTGAGCCAAG          | ACGAATCGAGAAAGAGCCTCA           |                   | 0.852                   |
| RepA_GSP1 <sup>f</sup>    | <i>AGTCGGTGCTTCATTC</i> ACTCT | GCCCCGATGGGCGAATAA              |                   | 0.815                   |
| RepA_GSP2                 | GGGTTGTTGCACTCTCTGGA          | TCATTCTCTGCCAAAGCGGT            |                   | 0.884                   |
| RepA_GSP3                 | AAGGTCTTGCCGCAGTGTA           | CAACGCCTGCCATATTGTCC            |                   | 0.845                   |
| <i>HOTTIP_GSP1</i>        | ATGGTAGGGTGTGGTGCTG           | CCCAGAACCCCTCGACAAAA            |                   | 0.861                   |
| <i>HOTTIP_GSP2</i>        | TCTCGCCTCTGACTCTGTTC          | GAAGAGTCGGTAAACACCGC            |                   | 0.888                   |
| <i>HOTTIP_GSP3</i>        | TTACGCCCGCAACAAAACAG          | CCCTCCTTCCTTCAAACGCT            |                   | 0.886                   |
| <i>HOTTIP_GSP4</i>        | TTCCACCTTTGCCGATACA           | GGAGATGGGTACCTAGGGGT            |                   | 0.871                   |
| <i>HOTTIP_GSP5</i>        | GCTTGGCAACTTCAGAAAGCA         | AGCAGCCGGGTAGTGTA AAA           |                   | 0.871                   |
| <i>XIST</i>               | CCCTACTAGCTCCTCGGACA          | ACACATGCAGCGTGGTATCT            |                   | 0.850                   |
| <i>SNHG5</i>              | GTGGACGAGTAGCCAGTGAA          | GCCTCTATCAATGGGCAGACA           |                   | 0.844                   |
| INT(GLuc)                 | CTCGTATTGCGAGCATAGCAA         | TTCAAGTTGATAACGGACTAGCCT        | pINT              | 0.891                   |

<sup>a</sup> As referred to in the main text, **Fig. 2a,c** and **Supplementary Figs. 4f, 6e**, and **12**

<sup>b</sup> As calculated using Realtime qPCR Miner (Ref 58.)

<sup>c-e</sup> After Refs. 39, 37 and 57, respectively

<sup>f</sup> Italicized nucleotides correspond to linker regions joining the lncRNA core to the sgRNA backbone

**Supplementary Table 4: Sequences of natural lncRNA constructs used in this study**

**pRNA**

CGAUGGUGGCGUUUUUGGGGACAGGUGUCCGUGUCGCGUGUCGCGCGUCGCCUGGGCCGGCGGUGGUCGGUGACGCGACCUCGCGCCCGGGGA

**FALEC (ncRNA-a1)**

GCGCAUCUCCUACGGCCUCCAGGACAGAGGAACCGGGGAGGCAGGGGAAAAGGCCGCCAGCAAUCCCCUACCCCCGGUCCACGUGUACCCUCCUGGCCU  
GGGUCGCCCCAGCCACGGGGAGCGGGCGGAGUCCUGGCCACGAAGCCUUGUCACCGGGGGGAAUCCGCAAGCGGAGACUUGUCUUUAAAGGGCUUUGGGCC  
GGGCGCGGUGGCUCAUGCCUGGAAUCCAGCACUUUGGGAGGCCGAGGCGGUGGAUCACGAGGUCAGGAGUUCAAGACCAGCCUGGCCAAGAAGCUCUACUGACU  
AAGGCAGCAGAACAACAGGAGGAAGAGGAGCAGGUUUCACAGAGGGAAGACAUGAGUUCAAUUUUGGACUUCUCAGUAGUCGGUGUCCUAGUGGUAGCAACUUC  
AAACGGAAGGUGUCAAAAGUCAAAUUCUGGAGAGUAGUAUGAAUUGGGAGAUGAAGAAAAGGAGGCAGCACUUGUAGCCUGCUCUUAUUGUAUUUCUGCACUCUA  
CACUAGCAGCCUUAUACACAGGACACUUGGAUGUCU

**TRERNA1 (ncRNA-a7)**

CCGUUCCUGCCUCCACAGACACCUAUUAAGUGCCUCCAGUUUAGGAACUGGGUAUAGAUUAGGCGGGAAACAAAUGGAAGAAAACAAAACAAAACUCCUGC  
CCUCAUGGUGCUGACUCCUGUGGCAGAGACGGAGAAGAUGAACAGGGAUUUUUUAUACAGGCGUCAGAAAGGGAACCAGUGCAAAAGAAAUGAAAACACCAGGCC  
GGGAGAGGCAGCUGGCAUGCGGGCCGUGGUGUUUACUGGCCGAUUUGAGAGAGUGAGACCCUUGGGGUCUUGGAGCCAGGCCUGGAAAAGCUACUUCACGUC  
AGGCCAGGGGCGUAGCCUUGGCAACCUCCACUCCGCCUGGAAAUCUCCACCUCGGGGCCUCUCUUUGCCCAGACCUGGCCCAGGAGGAGCACAUUGGAGCCGGG  
ACCUUCCAAACAUCUUGCCGUUGGCUCACAAACCUCAGCCAGUCCUGCAACCUGGGAUGCCUUUCCACCAGGAUGCCUGCUACUGUCACUGUUGCAUUAGA  
UAAUUAUGAACUAUAAUAGAAAUCAUAUCAAUAAAUUUCACAGUCUAAAGGCGUUGAAAUAGG

**ncRNA-a3**

GAAGUUGAGCUUCAGGCGCGGCUCUCCCCGUCACACUGGGACCGGACGCAUUUCCAUGGCGUGGCCAGGAACCUCUCAGAGUGAACUGAAUUGGAUGCAAGAU  
CACGGUGCGUCAGAGCUAGCAAGAUCUUAGGAUCAUUUAGCCUGGUUUAUUAUUAUACUAUUGGAAUUUAAAGCCCAAGGAAUGGAGAGUACCCGACGAGCGUU  
AUGUAAGGAGUCGAGUGAGAAGUAAGCUGGAUGCUCUGCUUGGCUGGCAGGUACAGAAUGGCCAGACCAUCUGUACCAGCCUGGAUCUCUUGAGGCAUCAGCAC  
AAUGGACCUGGCCACACCAGUUUAUCCACACCGCUGAGGCUGGUCUUUGAGGAUACCCACACUGUCUCCACAUGCACCAUGGAAUACUAUGCAGACAUAAAA  
AGGAAUGAGAUAUGUCUUUGCAGGGACAUGGAUGGAGCUAGAAGCCAUUAUCCUCAGAAAACUAACACAGGAACAGAAAACCAAUACCACAUGUUCUCACUUA  
UAAGUGGGAGCUGAAUGAUGAGAACACAUGGACACGUGGUGCGGGAACAAUACACCUGGGGCGUUGGAGGGGUGGGGGCGUGGGAGGAGGAGCAUCAAGAAUA  
GCUAAUGAGGCCAGGCACAGUGGCUCACGCCUGAAUCCUAGCAUUUUGGGAGGCUGAGGCGGGCAGAUCAUUUGAGGUCAGGAGUUUGAGACCAGCCUGGCCAAU  
AUGGUGAAACCCGUCUCUAUUAAAAUACAAAAUUAUAGCCAGGCAUGGUGGCAUUGCCGUAUCCUGCAACUUGGGAGGCUGAGGCAGGAGAAUCGUUUGA  
ACCUGGGAGGUGGAGUUUGCAGUGAGCCAAGAUCCGCCACUCGACUCCAGCCUGGGCGACAGAGUGAGGCUC

**RepA**

CACUCUCUUUUCUAUUAUUUGCCCAUCGGGGCUGCGGAUACCUGGUUUUAUUAUUUUUUCUUUGCCCAACGGGGCCGUGGAUACCUGCCUUUAUUUCUUUUUAU  
UCGCCCAUCGGGGCCGCGGAUACCUGCUUUUUUUUUUUUUUCCUUAAGCCCAUCGGGGUAUCGGAUACCUGCUGAUUCCUUCUCCUUGAACCCCCAACACUCUG  
GCCAUCGGGGGACGGAUAUCUGCUUUUUAAAAUUUUUUUUUUUGGCCCAUCGGGGCUUCGGAUACCUGCUUUUUUUUUUUUUUAUUUUUCCUUGCCCAUCGGG  
GCCUCGGAUACCUGCUUUAAUUUUUGUUUUUCUGGCCCAUCGGGGCCGCGGAUACCUGCUUUUGAUUUUUUUUUUUUAUUCGCCCAUCGUGUCUUUUUAUGGAUGAAA  
AAUUGUUGUUUUUGGGUUGUUGCACUCUCUGGAAUACUACAUUUUUUUUGCUGCUGAUCAUUUGGUGGUGUGUGAGUACCUACCGCUUUGGCAGAGAAUG  
ACUCUGCAGUUAAGCUAAGGGCGUGUUCAGAUUGGAGGAAAAGUGGCCCAUUUAGACUUGCCGAUAACUCGGCUUAGGGCUAGUCGUUUUGUCUAAGUUA  
AACUAGGGAGGCAAGAUGGAUGAUAGCAGGUCAGGCAGAGGAAGUCAUGUGCAUUGCAUGAGCUAAACCUAUCUGAAUGAAUUGAUUUUGGGGCUUGUUAGGAGCUU  
UGCGUUAUUGUUAUCGGGAGGCAGUAAGAAUCAUCUUUAUCAGUACAAGGGACUAGUUAAAAUUGGAAGGUUAGGAAAGACUAAGGUGCAGGGCUUAAAAUGG  
CGAUUUUGACAUUGCGCAUUGCUCAGCAUGGCGGGCUGUCUUUGUAGGUUUGCCAAAUGGGCGGAUCCAGUUCUGUCGAGUGUUAAGUUGGGCGGAAGGCCA  
CAUCAUGAUGGGCGAGGCUUUGUUAAGUGGUUAGCAUGGUGGUGGACAUGUGCGGUCACACAGGAAAAGAUUGCGGCUAAGGUCUUGCCGAGUGUAAAAAUGG  
CGGGCCUCUUUGUCUUUGCUGUGUCUUUUCGUGUUGGGUUUUGCCGAGGGACAUAUGGCAGGCGUUGUCAUAUGUAUAUCAUGGCUUUUGUCACGUGGACAUC  
AUGGCGGGCUUGCCGAUUUGUUAAGAUGGCGGGUUUUGCCGCCUAGUCCACGCAGAGCGGGAGAAAAGGUGGGAUGGACAGUCUGGAUUGCUGCAUAACCCAA  
CCAAUUGAAAUGGGGGUGGAAUUGAUCACAGCCAAUUAAGAGCAGAAGAUGGAAUUAAGACUGAUGACACACUGUCCAGCUACUCAGCGAAGACCUGGGUGAAUUG  
CAUGGCACUUCGCAGCUGUCUUUAGCCAGUCAGGAGAAAAGAUGGAGGGGCCACGUGUAUGUCUCCAGUGGGCGUACACC

(continued on next page)



Supplementary Table 4 (continued):

**HOTTIP**

GUGGGGCCAGACCCGCGCAACCAGGCGGGGAGGGGAGGUGGGCGCGGAUUGGGUUGCGAUCUGGAGCAGUGGGGACAGGUCAGGAACCGGCGGUAUUUCUGCA  
GUGAGACCACAGGACGGACAUCGGCGCCUUCGGCUUCGAUGGAGUUGCGAUUUUGUCUUCUCCAGGAAAACAGUGGCAGGGUGUUUGUCUCUUAUCGGUUCUCGCG  
GAUAUGCCUGGGUCCAGGACAUUCCACUGGAGGCUUGGACUGCAUUUAGGAGCCCCUAUCCUUCUCCUGUCCACACUGUUAGUGAGCAAUUUCAUAUGUUUGCAU  
UUAGACCCAUAGACUCAGAACGACUCAACACACACACACAGUGUACACUGACACACUCAUUCGCACACUUAGGUAUACAGCCUGAUCCUUGUCUCUGACCUGG  
UAACAACGCUUCCUCCAGAGACUUUAGAUAGAGCGAGCGAUCCUGUGCACC AUUCAUCCAUUGCUCUCCACCUCGCCAGUAUUGGCUGGCUUAGUUCUGGAAGG  
GGCUUAAGAGGAACAAGCCCAGCUGUGCUUCUGGCUGGGACUUAACCCCCUUCUGGGCCCUAAAGCCACGCUUCUUUGUGGACC GGACCUGACUCUCCAGGAA  
UCUGGGAACCCGCUAUUUACUCUAUUUUUGGGAACAAGAAAAGGGGCUUUUUGGGCCACUUCUGCCUUCUCCCUCAAGUAGGAUUCUCCAGCCUGCAGAGGGUGCC  
UAGUCCUUCUUUGCCAAAGAACCAGUCCAAAGAAGCCUUCUCUGUGCCUGGGAUUUGCAACCCUUUUUCUAGGAGCAUUGGUGGGUGUUGGUGUCUGAAGAACCAG  
CAGCGAACCGUCUUGUAGCUGCCAUGUUUUUGUCGAGGGGUUCUGGGGUCCUGUCUGCUUUAGAGCCACAUACUUCACUUCUCCUGAUUCACUACUGUGAGCUGGUA  
GAUGCCUAGAAGAGGAACAAGCGUUCAAAGUGAAAUGGGCACAUAUACCGGAAUAGUCUGGGGAGAGUCUGGAUUUUUCCACCCAGGCGGACUGGUGAGAA  
GCCAGGCUUGGACCUGUCCUCUGCUUCUAGCUUGCACACUCAGCCUAAAUCAGAGCAGCAGCAUACCACCCUCACACACACCCACCAUCUGUCUGUCAAGG  
CCCCUGGGCUUCCUGCAGGAUCCAGACCAAUGUGGCUGGGCUUGGGCUUUUAUCUGUCCUGAUCCUGGAUUUGUCCUGACCAAUGUAAGUUCGCCAAUAAAACC  
UUCUAUGACCCCCACACCAGCCACCCCCACCAAGUGUGCCUUCUUCUUGACUUUUUAGCAGUUCUGGGUAAAUAUUGAUUUUGCCCCAGUUUACCUUCUCC  
CUGACUGGCCAUUUGCAGACUCAGGAACUAGCCUCUGUAGGGACUUGAUUUUUCUGUUAUCUUCUGGCCGUUUCACCACCCCUUCUCCUCCUCCAAUGGGCAUUG  
UAAAACUCACAGUGACAAAAGAGACAGAGUAGGGUUCUAGGCCCCUGUUCUGGGGACUUGAAGGGCGUUUAUCAUACUGGUCAGACACGGCUGGAGGCAAGGUA  
AGUUGAAAGUUGCAGUCCAGCCAGCAUGAGAAACUGCCAUGCGAGCGUAGAGACACAGGCAGCAGCAAAAGGCCAUUGCCACAUCCCUACUCUUAUUUUUCUC  
UCUCUUUUUAAAUAUCUGCCUCUGACUCUGUUCGGCUGCCAGAAUUUUUUGGUGCCUUCUGUGGGUUUUUUGGGCGGUGUUUACCGACUCUUCUCUGCCUCCG  
CCUGCUCAGCCAGGGCUUUUGAGCCUUCGGUUUUCCGGCCAGACC CGGAAAACAGCAACAGCUUUGGGGAGCCCAUAGCCGGCGGUCUCCAGCUCAC  
UCUGGCCAUGGGCGCAGUCGCCGGUGCACACGGCGGCCAAGGCCAGCUCACAUUCUUCUCCUCCUCCUCCACUUCACCCGUAUCAGCCCGAACCCUGCGCGCAGAGAAA  
GGGUCUCAGCUCACAGACGACUGGGUCCUCCUCACAAAAAUGGUGAGACAAGAUUUCAUCUGUCGGCCGAGGAGCCACAAGCAGGUACCACAAGCCACUAGU  
GCACAGGGACUCAGAAAAGACGGCAGGAGCCCAAGGAAAACUCCAAUUUGAGUACAGCCUGCCUUGUUUCCCCAGAGAGUCCUGAGCAAGGAGACCUCACCC  
CACACACACCAUUCAGAAACAACCAGGUUCCAGACUCCAUAGAGGAGCAUCUCCACUGCAGAGCCUUGGCCAGCCGCGCCCGGACUCCUCAGAGCUGGCGCAAAC  
UCCGUCUCCAAAACUCGCGUCUGGGAGGCCUAAGUGACUCCGAAGCCGGCGGACGCCGCGGCGAGCCGCGGCGGUGGUGGUAAGAGCUCUUUUCCCGACAGUGCCA  
CUGAUCGUCUUCACUGGAGCUGGAAAACAGCCUUCGCGGAAAGGACC GGAGCAUGCGUUAGAAGCAGAGGGAGCUUGUGUAAGGGUCGGCUGGAAGGAGGAAACG  
CCUUCUCGCGAGUCGCGGCCAGCCCGCGGGGACACCCGCUUCUGGACUCGAGGGGCCUGGCCACCCAGGAAGUGACCUGCGGGUCACUCAGCCGGGGCGCUGG  
GCGAGCGCGGGACGGCCCGGAGAAUUCUGUGCGGUCGACGGGAAAAGGACGAGGGGUCUCUGUACCCGACGCUGCCACUGGCCCAAAGGAAUUUUACCCGCGAG  
CGCCACCCACCCUAGCUUGAUGCUUACGCCCCGCAACAAAACAGGAAACCAGGACUGGGCAGUGCAUUCUUUAAGUCAACAAAACACUGAAGACUUCGAGCGUU  
UGAAGGAAAGGAGGGGUUUUGACGUAAGCCUGCCCGCCGGCUCGGCUUCGUCGAGAAAGCAGGCGGCGCAGGCGAGCCAGCCAGCCCGGCGGCGGUGCCAU  
CUCGCCUAGACUCCUAAAGAACUCCACGGCCUGUUCUCCAGCUCGCGAAUUCUUAUUGCACAACGCGACGGAGGAAAGGAAUUCACCAGCCGACGCGACGGAAG  
GGGAACUCAGGACCCUUAAGUACACACUCAGAGGUGUAUCAGAGUUUAUGGGCACUUUAUUGCUGUAUAUAACGAUGUGUGGCCUUGAUUAGCACGCAUA  
UUCACGCAUCAAAACGUGCAUACACACACAGAGUGAAUGUGCGCAUCCAAUGUCAUGUGGGUGAAAUAACAAGCAUCAUACCCAGCCUACGAAAAAAAUAUACCC  
UGUCGGACCAGGCUGGUGACAUACUUCGUCGGCGCAUCUCCUACUCACUCUUAUUCUCCGACCCUACCAUUCUCCUCUGUGGCUGGUAUUAUACACUCC  
CCUCCGUGGAAGGUGAGUCCUGGACUGGCGUUGCCAGGUUCGCAUGUCCUCCAGAACUCCGUCUGGCUCAGGGACUCUCACUGAGCGGGUCUAGAGCACCCA  
GCACUUUCAAGGAACAGCCGCGGUUCCUUUGUCCCGCGGUCUCCAGCCCGUUCGGCCAGCUCUCAGGGAAACGAAGCGCUCAGUAAGAACUUUUGAUUUAGUU  
UGUAUGGGUUAUUACACUCUGGUGAGGGGAGCUGAGUACGGAAUUCACUUAUAUACUCCAACCUUGGGUUUAGAUUAUCAGUUUUGGGUUGGGAGAGGGAGU  
UUGCCGAAAAGAAAGCAUCAAGGUUGGCCGUGACUCCAGAGAAAUGAAAAGGGAGCAAGGUCGUUUUCUGUUUCUGGAAAUCAAGAAUAGGAAUGGGCAACUAC  
AGGUGCUAACCAACAGACCACUUUUUUGUUUUUUGGUAAGCCUUGGCAGGGAUAGUUUUUCCACCUUUGCCGUAUACAAUUUAAAAAUAUCCUUUUUAUUAU  
GGAUUUUGUCAAAACACACACAAGCAUAAACAACCCUAGGUACCCAUUCUCCAGUUCUUAUUAUUAUUAUUAUUAUUAUUAUUAUUAUUAUUAUUAUUAUUAU  
CUCUCUCAUUCUUUAGUUAUUUAAAAGUAAAUCCAGAUAGCAUCACAUUUUACCCCAUAGGAAUUUCAAGAUUCUGUUUAUUUCAAGAUAUGAGUAAAAG  
GGCUUGAAAUUGGGUUAUUGCAAUGAAAACUCUAGAAAAAGCUUGAGGGUUCACCCAGGAGUAAGCUGGACAAAAAAGGGGUUUGAGGGGUGGACCCAUCUUGCCUA  
AAAAUCUUGUCUCAUCUUUCUAAAAUUACAUAUGAAAAGAGGAAGAUUUUAGUUACUUUUUAUUAUGAGAGAAUCGUCCUUUAUAGAAAAUUUCUAUUGCUGCAU  
CAGAAUUAUGGAGGAACACAAAAACAUAUCCUAGUCCUUAAGUGUGUCCUAAAUAUACACAUAUUCACUUAUUAUGAGGUAUUAUGACUUAUUAUUAUUAUUAUUAU  
ACUUCUCCUUGGUAAGAAACAAAAAGAAAUUUCUAUAGAUUAACUAGGAAAGUUUGCACUGAAUUAUGGCUUAUCAGAGCAACCCGAGUUUCAGGAAGAAA  
UCAUUGCCAUUGCGUUGAAAUAUCCUCCUAGCAUUAAGGAAUUAUUUUAAAAAAGAAUGAAUUAAGAUUUUCUGGUUUUUUUGUUUUUAUCUGGUAGUCUUAU  
UACAACGAGCAUGAUUCUCCUGUCGAACUCUGAAAAGUACUUAACUGAAAAGGUUGGCAACUUCAGAAAAGCAAAAAGGUAAAAACAGAAAAUAGCACCGGUUGA  
AUUUGACAACUUUACACUACCCGGCUGCUUAAUAAAUCUAAACCCACU

**Supplementary Table 5:** Sequences of the internal insertion constructs in **Figures 3a, b, e, f** and **4**. All constructs had the constant backbone:

GAUCUAGAUACGACUCACUAUGUUUAAGAGCUAUGCUGCGAAUACGAGXXXXCUCGUUUUCGACAGCAUAGCAAGUUUAAAUAAGGCUAGUCCGUUAUCAACUUGAAAAAGUGGCACCGAGUCGGUGCUUUUUUU  
 ...wherein **XXXX** is replaced with the sequence below.

| Construct                    | Insert Sequence                                                                                                                                                                                                                                           |
|------------------------------|-----------------------------------------------------------------------------------------------------------------------------------------------------------------------------------------------------------------------------------------------------------|
| 1xPP7 SL                     | GGAGCAGACGAUAUGGCGUCGCTCC                                                                                                                                                                                                                                 |
| S1 Aptamer                   | CCGACCAGAAUCAUGCAAGUGCGUAAGAUAGUCGCGGGCCGGC                                                                                                                                                                                                               |
| 3xMS2 SL                     | CGUACACCAUCAGGGUACGUCUCAGACACCAUCAGGGUCUGUCUGGUACAGCAUCAGCGUACC                                                                                                                                                                                           |
| 3xCsy4 SL                    | UCUUACUGCUGUAUAAGCAGCUCUACUGCCGUGUAGGCAGCUUCUACUUCUGUAUAAGAAGCUUUC                                                                                                                                                                                        |
| 3xPP7 SL (“INT”)             | GGAGCAGACGAUAUGGCGUCGCUCCUCUCCACGAGAGCAUAUGGGCUCCGUGGUCUCCAGCAGACGAUAUGGCGUCGCUCCG                                                                                                                                                                        |
| GFP Aptamer                  | GCUUCUGGACUGCGAUGGGAGCACGAAACGUCGUGGGCGCAAUUGGGUGGGGAAAGUCCUUAAGAGGGCCACCACAGAAGCC                                                                                                                                                                        |
| Spinach2                     | GAUGUAAACUGAAUGAAAUGGUGAAGGACGGGUCCAGUAGGCUGCUUCGGCAGCCUACUUGUUGAGUAGAGUGUGAGCUCCGUAA-CUAGUUACAUC                                                                                                                                                         |
| 3xK-T                        | UCUGCUCCCGUGAUGGGCGAAAGCCUGAGGAGCUCUCUGGCCGUGAUGGGCGAAAGCCUGAGCCAGUCUCUGCCCGUGAUGGGCGAA-AGCCUGAGGCAGUCU                                                                                                                                                   |
| Bunch of baby Spinach (BoBS) | AAGGACGGGUCCGGACGCAAGGACGGGUCCGACCGAAAGGACGGGUCCAAUGGUGGAAACACCAUUGUUGAGUAGAGUGUGAGU-CGGUCGUUGAGUAGAGUGUGAGGCGUCCGUUGAGUAGAGUGUGAG                                                                                                                        |
| 5xPP7 SL                     | GGAGCAGACGAUAUGGCGUCGCUCCUCUCCACGAGAGCAUAUGGGCUCCGUGGUCUGCAGCAGACGAUAUGGCGUCGCUCCUCU-CGUAGAUGCCAUAUGGGGCACUACGUCUCCAGCAGACGAUAUGGCGUCGCUCCG                                                                                                               |
| P4-P6[3xPP7 SL]              | UCUGGAAUUGCGGGAAAGGGGUCAACAGCCGUUCAGUACCAAGUCUCAGGGGAAACUUGAGAUUGGCCUUGCAAAGGGUAUGGU-AAUAAGCUGACGGACAUGGUCCUAACACGCAGCCAAGUCCUAAGUCAACAGUCUGGAGCAGACGAUAUGGCGUCGCUCCUCUCCA-CGAGAGCAUAUGGGCUCCGUGGUCUCCAGCAGACGAUAUGGCGUCGCUCCGUCUGUUGAUUAUGGAUGCAGUUCAUCU |

PP7 SL: cognate stem-loop recognized by the PP7 phage coat protein<sup>7</sup>. S1: an artificial streptavidin aptamer<sup>53</sup>. MS2 SL: cognate stem-loop recognized by the MS2 phage coat protein<sup>5</sup>. Csy4 SL: cognate stem-loop recognized by the *P. aeruginosa* Csy4 protein<sup>54</sup>. GFP aptamer: an artificial GFP/YFP/CFP aptamer<sup>55</sup>. Spinach2: an artificial, small-molecule-binding fluorescent aptamer<sup>51</sup>. K-T: a cognate “kink-turn” motif recognized by the *A. fulgidus* L7Ae protein<sup>56</sup>. BoBS: “Bunch of Baby Spinach” (**Supplementary Fig. 11**). P4-P6: the thermostable  $\Delta C209$  mutant of the *T. thermophila* group I intron P4-P6 domain<sup>40</sup>, as in (**Supplementary Fig. 4a-b**).

**Supplementary Table 6:** Amplification primers used to generate INT-N<sub>25</sub> Pool sequencing libraries

| Primer                         | Sequence                                                                                   |
|--------------------------------|--------------------------------------------------------------------------------------------|
| RT Primer                      | CGACTCGGTGCCACTTTT                                                                         |
| Forward Library <sup>a,b</sup> | CAAGCAGAAGACGGCATACGAGATXXXXXXGTGACTGGAGTTCAGACGTGTGCTCTTCCGATCT-<br>TCAAGTTGATAACGGACTAGC |
| Reverse Library <sup>a</sup>   | AATGATACGGCGACCACCGAGATCTACACTCTTCCCTACACGACGCTCTTCCGATCTAGCTATG-<br>CTGCGAATACGAG         |

<sup>a</sup>Illumina™ adapters are highlighted in blue; indexes in yellow

<sup>b</sup>X's correspond to Illumina™ indexes 1–7.

**Supplementary References**

1. Cong, L., Zhou, R., Kuo, Y.C., Cunniff, M. & Zhang, F. Comprehensive interrogation of natural TALE DNA-binding modules and transcriptional repressor domains. *Nature communications* **3**, 968 (2012).
2. Zhang, F. et al. Efficient construction of sequence-specific TAL effectors for modulating mammalian transcription. *Nature biotechnology* **29**, 149-153 (2011).
3. Boch, J. et al. Breaking the code of DNA binding specificity of TAL-type III effectors. *Science* **326**, 1509-1512 (2009).
4. Moscou, M.J. & Bogdanove, A.J. A simple cipher governs DNA recognition by TAL effectors. *Science* **326**, 1501 (2009).
5. LeCuyer, K.A., Behlen, L.S. & Uhlenbeck, O.C. Mutants of the bacteriophage MS2 coat protein that alter its cooperative binding to RNA. *Biochemistry* **34**, 10600-10606 (1995).
6. Cate, J.H. et al. Crystal structure of a group I ribozyme domain: principles of RNA packing. *Science* **273**, 1678-1685 (1996).
7. Chao, J.A., Patskovsky, Y., Almo, S.C. & Singer, R.H. Structural basis for the coevolution of a viral RNA-protein complex. *Nature structural & molecular biology* **15**, 103-105 (2008).
8. Schwanhausser, B. et al. Global quantification of mammalian gene expression control. *Nature* **473**, 337-342 (2011).
9. Douglass, E.F., Jr., Miller, C.J., Sparer, G., Shapiro, H. & Spiegel, D.A. A comprehensive mathematical model for three-body binding equilibria. *Journal of the American Chemical Society* **135**, 6092-6099 (2013).
10. Rinn, J.L. & Chang, H.Y. Genome regulation by long noncoding RNAs. *Annual review of biochemistry* **81**, 145-166 (2012).
11. Ulitsky, I. & Bartel, D.P. lincRNAs: genomics, evolution, and mechanisms. *Cell* **154**, 26-46 (2013).
12. Meckler, J.F. et al. Quantitative analysis of TALE-DNA interactions suggests polarity effects. *Nucleic acids research* **41**, 4118-4128 (2013).
13. Wu, B., Chen, J. & Singer, R.H. Background free imaging of single mRNAs in live cells using split fluorescent proteins. *Scientific reports* **4**, 3615 (2014).
14. Delebecque, C.J., Lindner, A.B., Silver, P.A. & Aldaye, F.A. Organization of intracellular reactions with rationally designed RNA assemblies. *Science* **333**, 470-474 (2011).

15. Geary, C., Chworos, A. & Jaeger, L. Promoting RNA helical stacking via A-minor junctions. *Nucleic acids research* **39**, 1066-1080 (2011).
16. Gao, Y. & Zhao, Y. Self-processing of ribozyme-flanked RNAs into guide RNAs in vitro and in vivo for CRISPR-mediated genome editing. *Journal of integrative plant biology* **56**, 343-349 (2014).
17. Nissim, L., Perli, S.D., Fridkin, A., Perez-Pinera, P. & Lu, T.K. Multiplexed and Programmable Regulation of Gene Networks with an Integrated RNA and CRISPR/Cas Toolkit in Human Cells. *Molecular cell* **54**, 698-710 (2014).
18. Cuello, P., Boyd, D.C., Dye, M.J., Proudfoot, N.J. & Murphy, S. Transcription of the human U2 snRNA genes continues beyond the 3' box in vivo. *The EMBO journal* **18**, 2867-2877 (1999).
19. Bartlett, J.S. et al. Efficient expression of protein coding genes from the murine U1 small nuclear RNA promoters. *Proceedings of the National Academy of Sciences of the United States of America* **93**, 8852-8857 (1996).
20. de Vegvar, H.E., Lund, E. & Dahlberg, J.E. 3' end formation of U1 snRNA precursors is coupled to transcription from snRNA promoters. *Cell* **47**, 259-266 (1986).
21. Hernandez, N. & Weiner, A.M. Formation of the 3' end of U1 snRNA requires compatible snRNA promoter elements. *Cell* **47**, 249-258 (1986).
22. Fuke, H. & Ohno, M. Role of poly (A) tail as an identity element for mRNA nuclear export. *Nucleic acids research* **36**, 1037-1049 (2008).
23. Mitton-Fry, R.M., DeGregorio, S.J., Wang, J., Steitz, T.A. & Steitz, J.A. Poly(A) tail recognition by a viral RNA element through assembly of a triple helix. *Science* **330**, 1244-1247 (2010).
24. Conrad, N.K., Mili, S., Marshall, E.L., Shu, M.D. & Steitz, J.A. Identification of a rapid mammalian deadenylation-dependent decay pathway and its inhibition by a viral RNA element. *Molecular cell* **24**, 943-953 (2006).
25. Conrad, N.K. & Steitz, J.A. A Kaposi's sarcoma virus RNA element that increases the nuclear abundance of intronless transcripts. *The EMBO journal* **24**, 1831-1841 (2005).
26. Brown, J.A. et al. Structural insights into the stabilization of MALAT1 noncoding RNA by a bipartite triple helix. *Nature structural & molecular biology* **21**, 633-640 (2014).
27. Wilusz, J.E. et al. A triple helix stabilizes the 3' ends of long noncoding RNAs that lack poly(A) tails. *Genes & development* **26**, 2392-2407 (2012).
28. Wilusz, J.E., Freier, S.M. & Spector, D.L. 3' end processing of a long nuclear-retained noncoding RNA yields a tRNA-like cytoplasmic RNA. *Cell* **135**, 919-932 (2008).

29. Battle, D.J. et al. The SMN complex: an assembly machine for RNPs. *Cold Spring Harbor symposia on quantitative biology* **71**, 313-320 (2006).
30. Huber, J. et al. Snurportin1, an m3G-cap-specific nuclear import receptor with a novel domain structure. *The EMBO journal* **17**, 4114-4126 (1998).
31. Briner, Alexandra E. et al. Guide RNA Functional Modules Direct Cas9 Activity and Orthogonality. *Molecular cell* **56**, 333-339 (2014).
32. Wright, A.V. et al. Rational design of a split-Cas9 enzyme complex. *Proceedings of the National Academy of Sciences of the United States of America* **112**, 2984-2989 (2015).
33. Konermann, S. et al. Genome-scale transcriptional activation by an engineered CRISPR-Cas9 complex. *Nature* **517**, 583-588 (2015).
34. Zalatan, J.G. et al. Engineering complex synthetic transcriptional programs with CRISPR RNA scaffolds. *Cell* **160**, 339-350 (2015).
35. Tsai, S.Q. et al. Dimeric CRISPR RNA-guided FokI nucleases for highly specific genome editing. *Nature biotechnology* **32**, 569-576 (2014).
36. Chen, B. et al. Dynamic imaging of genomic loci in living human cells by an optimized CRISPR/Cas system. *Cell* **155**, 1479-1491 (2013).
37. Maeder, M.L. et al. CRISPR RNA-guided activation of endogenous human genes. *Nature methods* **10**, 977-979 (2013).
38. Mali, P. et al. CAS9 transcriptional activators for target specificity screening and paired nickases for cooperative genome engineering. *Nature biotechnology* **31**, 833-838 (2013).
39. Perez-Pinera, P. et al. RNA-guided gene activation by CRISPR-Cas9-based transcription factors. *Nature methods* **10**, 973-976 (2013).
40. Juneau, K., Podell, E., Harrington, D.J. & Cech, T.R. Structural basis of the enhanced stability of a mutant ribozyme domain and a detailed view of RNA--solvent interactions. *Structure* **9**, 221-231 (2001).
41. Leontis, N.B. & Westhof, E. Geometric nomenclature and classification of RNA base pairs. *Rna* **7**, 499-512 (2001).
42. Ryan, O.W. et al. Selection of chromosomal DNA libraries using a multiplex CRISPR system. *eLife* **3** (2014).
43. Trapnell, C. et al. Differential analysis of gene regulation at transcript resolution with RNA-seq. *Nature biotechnology* **31**, 46-53 (2013).
44. Hsu, P.D. et al. DNA targeting specificity of RNA-guided Cas9 nucleases. *Nature biotechnology* **31**, 827-832 (2013).

45. Wu, X. et al. Genome-wide binding of the CRISPR endonuclease Cas9 in mammalian cells. *Nature biotechnology* (2014).
46. Kuscu, C., Arslan, S., Singh, R., Thorpe, J. & Adli, M. Genome-wide analysis reveals characteristics of off-target sites bound by the Cas9 endonuclease. *Nature biotechnology* (2014).
47. Tsai, S.Q. et al. GUIDE-seq enables genome-wide profiling of off-target cleavage by CRISPR-Cas nucleases. *Nature biotechnology* **33**, 187-197 (2015).
48. Strack, R.L., Disney, M.D. & Jaffrey, S.R. A superfolding Spinach2 reveals the dynamic nature of trinucleotide repeat-containing RNA. *Nature methods* **10**, 1219-1224 (2013).
49. Huang, H. et al. A G-quadruplex-containing RNA activates fluorescence in a GFP-like fluorophore. *Nature chemical biology* **10**, 686-691 (2014).
50. Warner, K.D. et al. Structural basis for activity of highly efficient RNA mimics of green fluorescent protein. *Nature structural & molecular biology* **21**, 658-663 (2014).
51. Song, W., Strack, R.L., Svensen, N. & Jaffrey, S.R. Plug-and-play fluorophores extend the spectral properties of Spinach. *Journal of the American Chemical Society* **136**, 1198-1201 (2014).
52. Paige, J.S., Wu, K.Y. & Jaffrey, S.R. RNA mimics of green fluorescent protein. *Science* **333**, 642-646 (2011).
53. Walker, S.C., Good, P.D., Gipson, T.A. & Engelke, D.R. The dual use of RNA aptamer sequences for affinity purification and localization studies of RNAs and RNA-protein complexes. *Methods in molecular biology* **714**, 423-444 (2011).
54. Sternberg, S.H., Haurwitz, R.E. & Doudna, J.A. Mechanism of substrate selection by a highly specific CRISPR endoribonuclease. *Rna* **18**, 661-672 (2012).
55. Tome, J.M. et al. Comprehensive analysis of RNA-protein interactions by high-throughput sequencing-RNA affinity profiling. *Nature methods* **11**, 683-688 (2014).
56. Saito, H. et al. Synthetic translational regulation by an L7Ae-kink-turn RNP switch. *Nature chemical biology* **6**, 71-78 (2010).
57. Chavez, A. et al. Highly efficient Cas9-mediated transcriptional programming. *Nature methods* (2015).
58. Zhao, S. & Fernald, R.D. Comprehensive algorithm for quantitative real-time polymerase chain reaction. *Journal of computational biology : a journal of computational molecular cell biology* **12**, 1047-1064 (2005).
